# Supplementary material
Source: Springer Nature journal article supplement (https://www.springermedizin.de/resource/supplementary/13023_2010_277_MOESM6_ESM.pdf/9642006)

Pre-weekly AAT Infusion ○ Post-weekly AAT Infusion ●

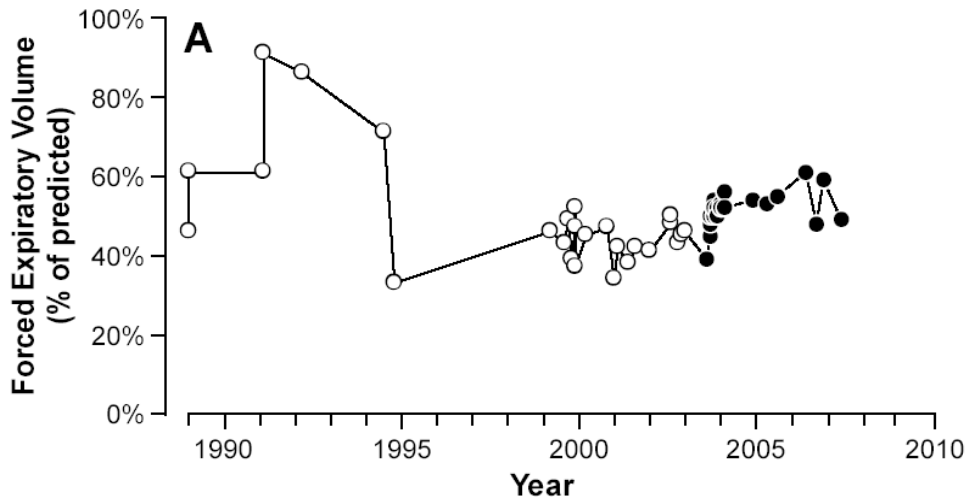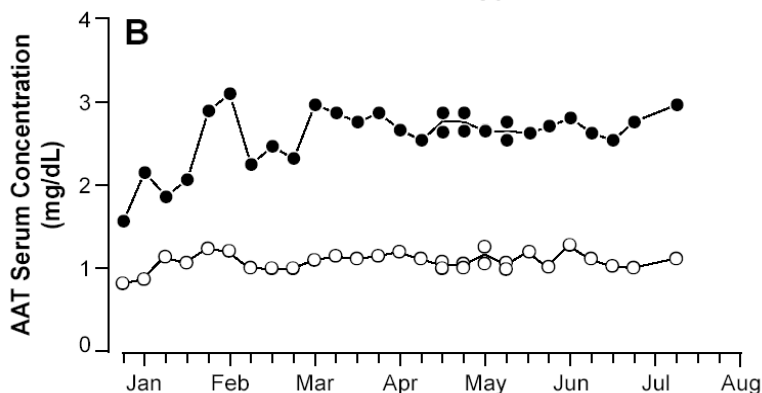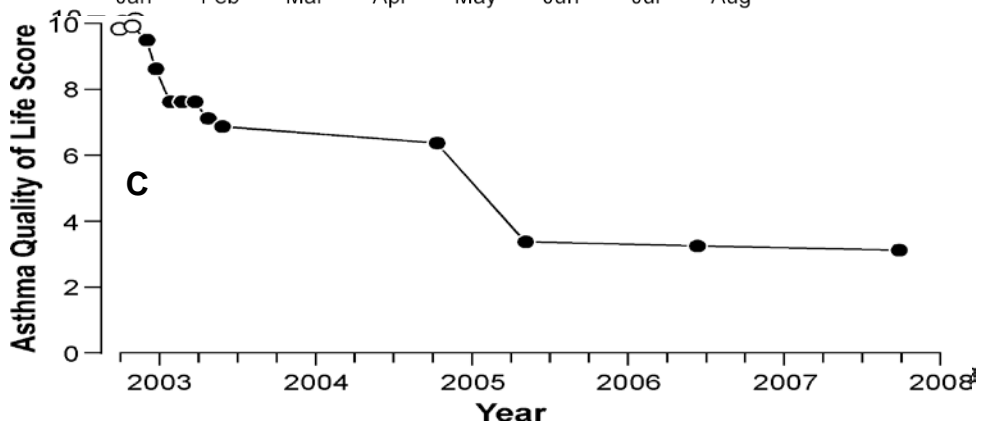

Supplement: MOESM6 [file 9642006]
